# Supplementary material
Source: Springer Nature journal article supplement (https://www.springermedizin.de/resource/supplementary/12982_2009_88_MOESM4_ESM.pdf/9604460)

**Model scenario 1**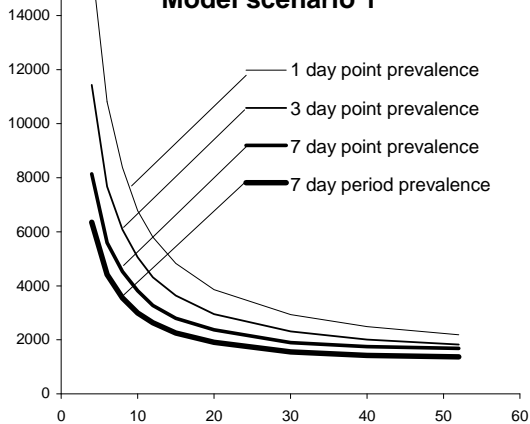**Model scenario 2**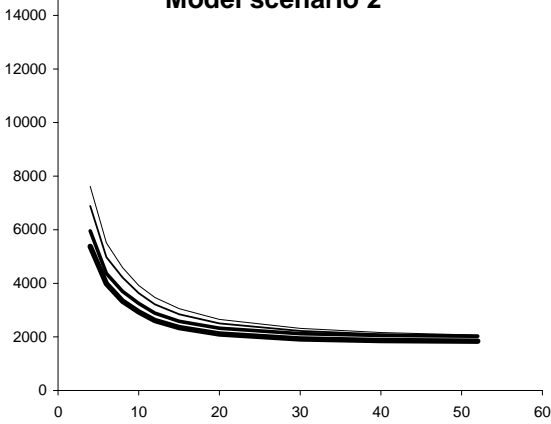**Model scenario 3**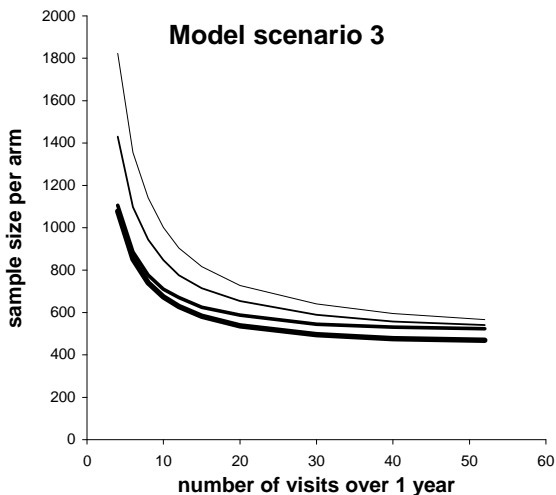**Model scenario 4**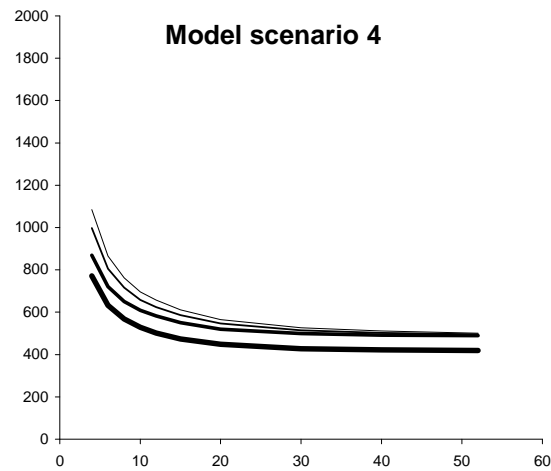

Supplement: MOESM4 [file 9604460]
